# Supplementary material
Source: publisher site journal article supplement (https://www.dovepress.com/get_supplementary_file.php?f=409828.docx)
Supplement: Supplementary file 1 [file get_supplementary_file.php]

eTable 1. ICD codes used to define dementia in MIMIC-IV database

| Codes | version | Long title |
| --- | --- | --- |
| 2912 | 9 | Alcohol-induced persisting dementia |
| 29410 | 9 | Dementia in conditions classified elsewhere without behavioral disturbance |
| 29411 | 9 | Dementia in conditions classified elsewhere with behavioral disturbance |
| 29420 | 9 | Dementia, unspecified, without behavioral disturbance |
| 29421 | 9 | Dementia, unspecified, with behavioral disturbance |
| 3310 | 9 | Alzheimer's disease |
| 33111 | 9 | Pick's disease |
| 33119 | 9 | Other frontotemporal dementia |
| 3312 | 9 | Senile degeneration of brain |
| 33182 | 9 | Dementia with lewy bodies |
| 33183 | 9 | Mild cognitive impairment, so stated |
| 78093 | 9 | Memory loss |
| 2948 | 9 | Other persistent mental disorders due to conditions classified elsewhere |
| 2900 | 9 | Senile dementia, uncomplicated |
| 29010 | 9 | Presenile dementia, uncomplicated |
| 29011 | 9 | Presenile dementia with delirium |
| 29012 | 9 | Presenile dementia with delusional features |
| 29013 | 9 | Presenile dementia with depressive features |
| 29020 | 9 | Senile dementia with delusional features |
| 29021 | 9 | Senile dementia with depressive features |
| 2903 | 9 | Senile dementia with delirium |
| 29040 | 9 | Vascular dementia, uncomplicated |
| 29041 | 9 | Vascular dementia, with delirium |
| 29042 | 9 | Vascular dementia, with delusions |
| 29043 | 9 | Vascular dementia, with depressed mood |
| 2908 | 9 | Other specified senile psychotic conditions |
| 2909 | 9 | Unspecified senile psychotic condition |
| 2900 | 9 | Senile dementia, uncomplicated |
| 29010 | 9 | Presenile dementia, uncomplicated |
| 29011 | 9 | Presenile dementia with delirium |
| 29012 | 9 | Presenile dementia with delusional features |
| 29013 | 9 | Presenile dementia with depressive features |
| 29020 | 9 | Senile dementia with delusional features |
| 29021 | 9 | Senile dementia with depressive features |
| 2903 | 9 | Senile dementia with delirium |
| 29040 | 9 | Vascular dementia, uncomplicated |
| 29041 | 9 | Vascular dementia, with delirium |
| 29042 | 9 | Vascular dementia, with delusions |
| 29043 | 9 | Vascular dementia, with depressed mood |
| 2908 | 9 | Other specified senile psychotic conditions |
| 2909 | 9 | Unspecified senile psychotic condition |
| 2940 | 9 | Amnestic disorder in conditions classified elsewhere |
| 29410 | 9 | Dementia in conditions classified elsewhere without behavioral disturbance |
| 29411 | 9 | Dementia in conditions classified elsewhere with behavioral disturbance |
| 29420 | 9 | Dementia, unspecified, without behavioral disturbance |
| 29421 | 9 | Dementia, unspecified, with behavioral disturbance |
| 2949 | 9 | Unspecified persistent mental disorders due to conditions classified elsewhere |
| 3310 | 9 | Alzheimer's disease |
| 33111 | 9 | Pick's disease |
| 3312 | 9 | Senile degeneration of brain |
| 3317 | 9 | Cerebral degeneration in diseases classified elsewhere |
| 33182 | 9 | Dementia with lewy bodies |
| 33189 | 9 | Other cerebral degeneration |
| 3319 | 9 | Cerebral degeneration, unspecified |
| F01 | 10 | Vascular dementia |
| F015 | 10 | Vascular dementia |
| F0150 | 10 | Vascular dementia without behavioral disturbance |
| F0151 | 10 | Vascular dementia with behavioral disturbance |
| F02 | 10 | Dementia in other diseases classified elsewhere |
| F028 | 10 | Dementia in other diseases classified elsewhere |
| F0280 | 10 | Dementia in other diseases classified elsewhere without behavioral disturbance |
| F0281 | 10 | Dementia in other diseases classified elsewhere with behavioral disturbance |
| F03 | 10 | Unspecified dementia |
| F039 | 10 | Unspecified dementia |
| F0390 | 10 | Unspecified dementia without behavioral disturbance |
| F0391 | 10 | Unspecified dementia with behavioral disturbance |
| G310 | 10 | Frontotemporal dementia |
| G3101 | 10 | Pick's disease |
| G3109 | 10 | Other frontotemporal dementia |
| G3183 | 10 | Dementia with Lewy bodies |
| G3184 | 10 | Mild cognitive impairment, so stated |
| G311 | 10 | Senile degeneration of brain, not elsewhere classified |
| G30 | 10 | Alzheimer's disease |
| G300 | 10 | Alzheimer's disease with early onset |
| G301 | 10 | Alzheimer's disease with late onset |
| G308 | 10 | Other Alzheimer's disease |
| G309 | 10 | Alzheimer's disease, unspecified |

Note: There is no decimal point in the “d_icd_diagnoses” table (one table of the MIMIC-IV database).

**eTable 2** A Univariate Comparison of Age and GCS (as categorical variables) With and Without Dysphagia in Older Adults With Dementia in Intensive Care Units.

| Variable | Overall(n=1009) | No-dysphagia(n=727) | Dysphagia(n=282) | P-value |
| --- | --- | --- | --- | --- |
| Age (%) |  |  |  | 0.014* |
| 65 ≤Age < 75 | 146(14.5) | 118(16.2) | 28(9.9) |  |
| 75 ≤Age < 99 | 863(85.5) | 609(83.8) | 254(90.1) |  |
| GCS (%) |  |  |  | <0.001* |
| 13 ≤GCS≤15 | 648 (64.2) | 525 (72.2) | 123 (43.6) |  |
| 9 ≤GCS ≤ 12 | 195 (19.3) | 116 (16.0) | 79 (28.0) |  |
| 3 ≤GCS≤ 8 | 166 (16.5) | 86 (11.8) | 80 (28.4) |  |

Note:

⁎Significant differences exist between patients with dementia with dysphagia and without dysphagia (p < 0.05).

**eFigure 1 Forest plot for subgroup analysis (based on a univariate Cox proportional-hazards regression model )**


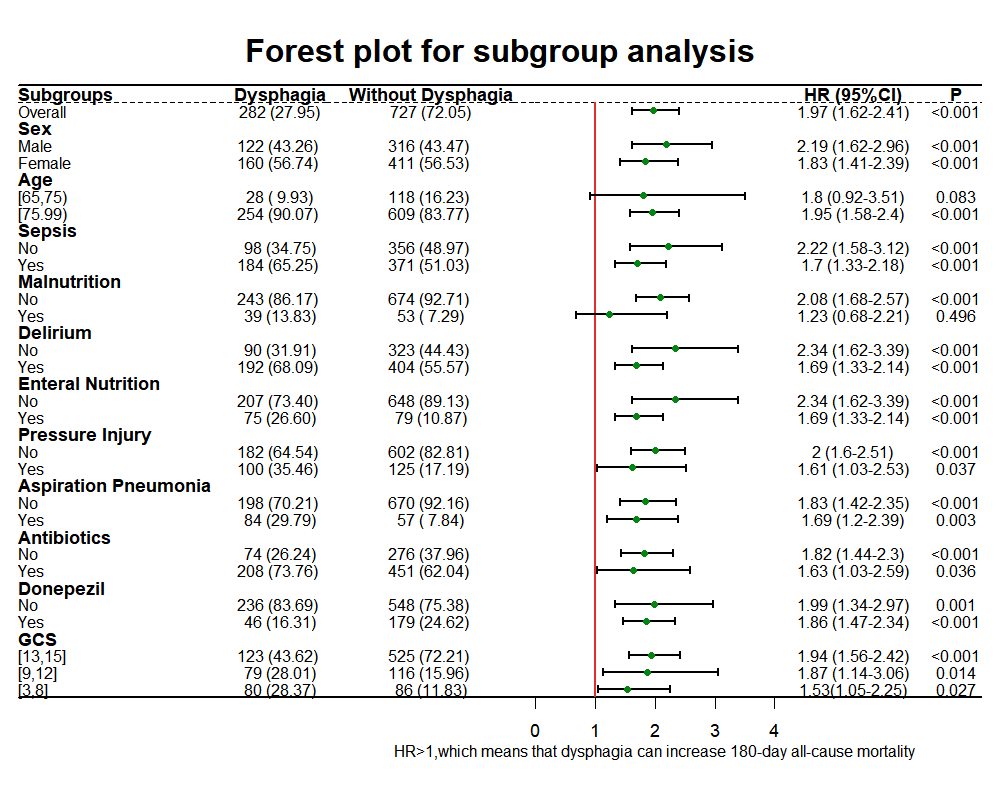


Abbreviations: GCS: Glasgow Coma Score

Note: Subgroup analysis was conducted to explore the association between dysphagia and 180-day all-cause mortality among different subpopulations of older adults with dementia. A p-value of less than 0.05 was considered statistically significant.
